# Supplementary material for: Assessment of Air Pollution in Bangkok Metropolitan Region, Thailand
Source: Copernicus journal article supplement (doi:10.5194/acp-2017-1063), 2017-12-13
Supplement: Supplementary file [file acp-2017-1063-AC1-supplement.pdf]

# Supplement Material

## Data availability of the study

| Station ID | CO     |        |        |        |        | NO    |        |        |        |        | NO <sub>2</sub> |        |        |        |       | SO <sub>2</sub> |        |        |        |        | O <sub>3</sub> |        |        |        |        |
|------------|--------|--------|--------|--------|--------|-------|--------|--------|--------|--------|-----------------|--------|--------|--------|-------|-----------------|--------|--------|--------|--------|----------------|--------|--------|--------|--------|
|            | 2010   | 2011   | 2012   | 2013   | 2014   | 2010  | 2011   | 2012   | 2013   | 2014   | 2010            | 2011   | 2012   | 2013   | 2014  | 2010            | 2011   | 2012   | 2013   | 2014   | 2010           | 2011   | 2012   | 2013   | 2014   |
| 3T         | Green  | Green  | Green  | Green  | Green  | Green | Yellow | Yellow | Green  | Green  | Green           | Yellow | Yellow | Green  | Green | Green           | Green  | Green  | Green  | Green  | Green          | Green  | Green  | Green  | Green  |
| 5T         | Green  | Green  | Green  | Green  | Green  | Green | Red    | Yellow | Green  | Yellow | Green           | Yellow | Green  | Yellow | Green | Green           | Green  | Green  | Green  | Green  | Green          | Green  | Green  | Green  | Green  |
| 10T        | Green  | Red    | Red    | Green  | Green  | Green | Yellow | Green  | Green  | Green  | Green           | Yellow | Green  | Green  | Green | Green           | Red    | Red    | Green  | Green  | Green          | Green  | Yellow | Green  | Green  |
| 11T        | Green  | Red    | Red    | Green  | Green  | Green | Red    | Red    | Green  | Green  | Green           | Red    | Red    | Green  | Green | Green           | Red    | Red    | Green  | Green  | Green          | Red    | Red    | Green  | Green  |
| 12T        | Green  | Red    | Red    | Yellow | Green  | Green | Red    | Red    | Yellow | Green  | Green           | Red    | Red    | Yellow | Green | Green           | Red    | Red    | Yellow | Green  | Green          | Red    | Red    | Yellow | Green  |
| 15T        | Green  | Red    | Red    | Green  | Yellow | Green | Red    | Red    | Yellow | Green  | Green           | Red    | Red    | Yellow | Green | Green           | Red    | Red    | Green  | Yellow | Green          | Red    | Red    | Green  | Green  |
| 61T        | Green  | Green  | Green  | Yellow | Red    | Green | Red    | Red    | Yellow | Red    | Green           | Red    | Red    | Yellow | Red   | Green           | Red    | Red    | Yellow | Red    | Green          | Red    | Red    | Yellow | Red    |
| 52T        | Green  | Red    | Red    | Green  | Green  | Green | Red    | Red    | Yellow | Green  | Green           | Red    | Red    | Yellow | Green | Green           | Red    | Red    | Yellow | Yellow | Green          | Red    | Red    | Yellow | Yellow |
| 54T        | Green  | Yellow | Green  | Green  | Green  | Green | Yellow | Yellow | Green  | Green  | Green           | Yellow | Yellow | Green  | Green | Green           | Green  | Green  | Green  | Green  | Green          | Yellow | Yellow | Green  | Green  |
| 13T        | Red    | Yellow | Green  | Yellow | Green  | Red   | Green  | Yellow | Yellow | Red    | Green           | Yellow | Yellow | Red    | Green | Red             | Yellow | Red    | Yellow | Red    | Green          | Red    | Red    | Yellow | Yellow |
| 14T        | Green  | Green  | Red    | Red    | Green  | Green | Red    | Red    | Yellow | Green  | Green           | Red    | Red    | Yellow | Green | Green           | Red    | Red    | Yellow | Green  | Green          | Red    | Red    | Yellow | Green  |
| 19T        | Yellow | Yellow | Red    | Red    | Yellow | Green | Red    | Green  | Yellow | Green  | Green           | Red    | Red    | Yellow | Green | Yellow          | Red    | Red    | Yellow | Green  | Green          | Red    | Red    | Yellow | Yellow |
| 20T        | Green  | Red    | Red    | Green  | Green  | Green | Yellow | Red    | Yellow | Green  | Green           | Yellow | Red    | Green  | Green | Green           | Red    | Red    | Green  | Green  | Green          | Red    | Red    | Green  | Green  |
| 22T        | Green  | Yellow | Red    | Green  | Green  | Green | Red    | Red    | Yellow | Green  | Green           | Yellow | Red    | Green  | Green | Green           | Yellow | Red    | Green  | Green  | Green          | Yellow | Red    | Yellow | Yellow |
| 27T        | Green  | Yellow | Yellow | Red    | Grey   | Green | Yellow | Yellow | Red    | Grey   | Green           | Yellow | Yellow | Red    | Grey  | Green           | Yellow | Yellow | Red    | Grey   | Green          | Yellow | Yellow | Yellow | Grey   |

Data completeness >80%
  Data completeness 70%-80%
  Data completeness <70%
  No measurement

**Fig. I:** Data availability from the 15 monitoring stations during 2010 to 2014.

## Maximum and average concentrations of gaseous pollutants

**Table I:** Maximum and average concentration of gaseous pollutants from the three monitoring station types during 2010 to 2014.

| Monitoring station type | Maximum concentration** (ppb) |             |                 |                 |                | Average concentration*** (ppb) |           |                 |                 |                |
|-------------------------|-------------------------------|-------------|-----------------|-----------------|----------------|--------------------------------|-----------|-----------------|-----------------|----------------|
|                         | CO*                           | NO          | NO <sub>2</sub> | SO <sub>2</sub> | O <sub>3</sub> | CO*                            | NO        | NO <sub>2</sub> | SO <sub>2</sub> | O <sub>3</sub> |
| BKK sites               | 5.7±0.9                       | 419.2±236.0 | 120.5±14.8      | 29.8±5.3        | 153.7±10.8     | 0.7±0.2                        | 16.3±7.8  | 20.2±5.7        | 3.3±1.0         | 18.6±2.3       |
| Roadside sites          | 8.0±0.4                       | 683.0±396.0 | 166.0±19.8      | 26.0±5.7        | 130.5±14.8     | 1.0±0.1                        | 60.5±42.7 | 30.9±8.1        | 2.6±1.0         | 13.9±8.6       |
| BKK suburb sites        | 4.5±1.2                       | 297.5±70.6  | 115.8±15.8      | 72.2±58.3       | 163.0±18.5     | 0.7±0.1                        | 11.4±3.8  | 16.1±2.6        | 4.0±2.3         | 21.4±3.3       |

\* in ppm

\*\* average maximum concentration ± 1 standard deviation (SD)

\*\*\* average concentration ± 1 SD

## Seasonal variations of gaseous pollutants

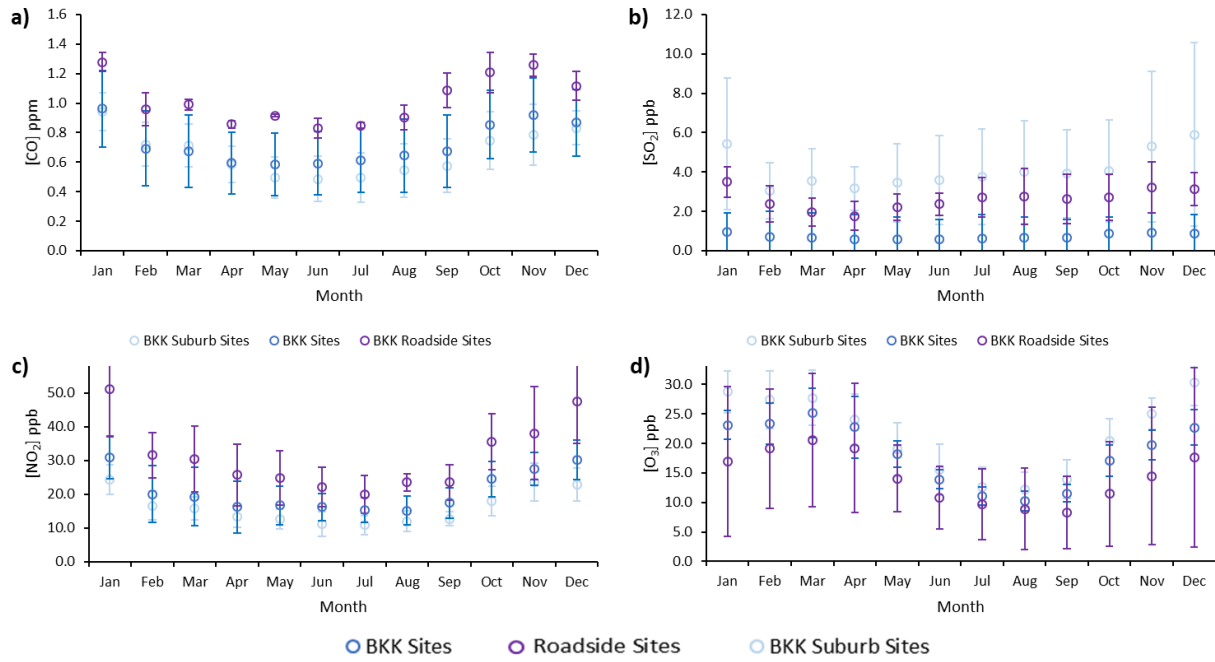

**Fig. II:** Seasonal variations of a) CO b) SO<sub>2</sub> c) NO<sub>2</sub> and d) O<sub>3</sub> from the three monitoring station types during 2010 to 2014.

### Inter-annual variations of gaseous pollutants

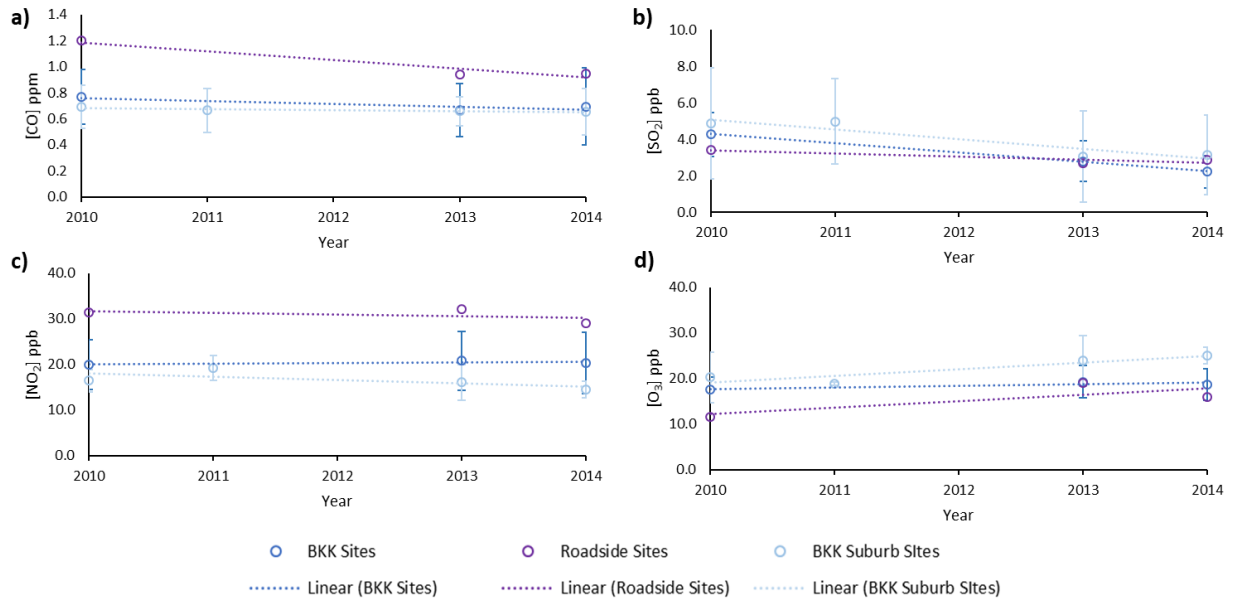

**Fig. III:** Inter-annual variations of a) CO b) SO<sub>2</sub> c) NO<sub>2</sub> and d) O<sub>3</sub> from the three monitoring station types during 2010 to 2014.

## Season wise of the diurnal variations of gaseous pollutants

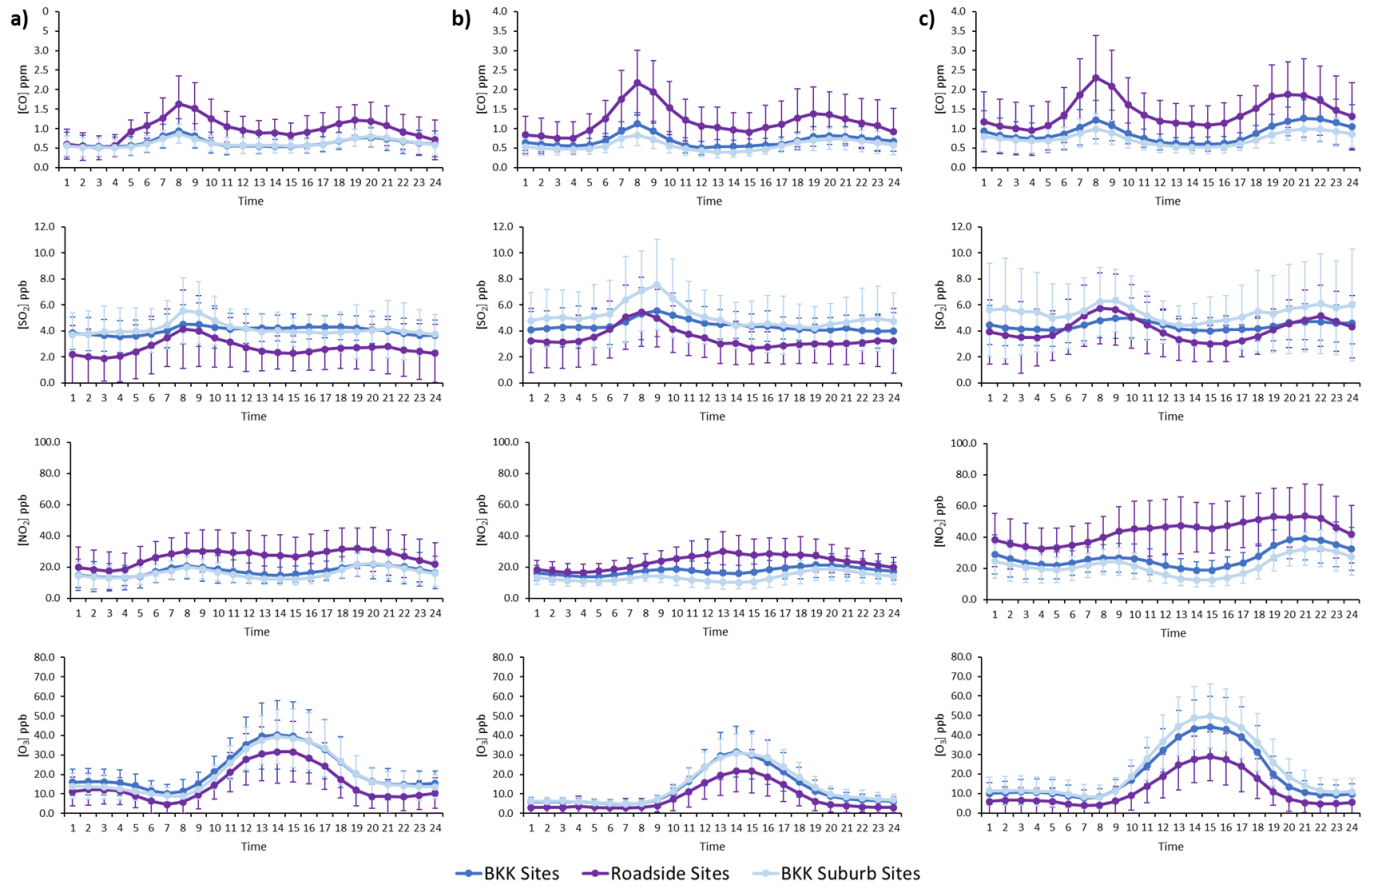

**Fig. IV:** Season wise of the diurnal variations of CO, SO<sub>2</sub>, NO<sub>2</sub> and O<sub>3</sub> during a) local summer b) wet season and c) local winter at the three monitoring station types.

## Chemical rate coefficients

**Table I:** chemical rate coefficients during dry season at BKK sites, roadside and BKK suburb sites, 2010 to 2014.

| Rate coefficient | Unit                                                   | BKK sites                                 | Roadside sites                            | BKK suburb sites                          |
|------------------|--------------------------------------------------------|-------------------------------------------|-------------------------------------------|-------------------------------------------|
| $j_1$            | min <sup>-1</sup>                                      | 29.7±0.7                                  | 29.7±1.0                                  | 29.8±0.7                                  |
|                  | s <sup>-1</sup>                                        | 0.004±0.002                               | 0.007±0.0001                              | 0.006±0.003                               |
| $k_3$            | ppm <sup>-1</sup> min <sup>-1</sup>                    | 0.47±0.2                                  | 0.64±0.3                                  | 0.55±0.3                                  |
|                  | cm <sup>3</sup> molecule <sup>-1</sup> s <sup>-1</sup> | 2.02e <sup>-14</sup> ±2.1e <sup>-16</sup> | 2.03e <sup>-14</sup> ±1.2e <sup>-18</sup> | 2.03e <sup>-14</sup> ±1.4e <sup>-16</sup> |

**Correlation plots and correlation ( $r$ ) between CO/NO<sub>x</sub> and SO<sub>2</sub>/NO<sub>x</sub> and concentration distribution of species**

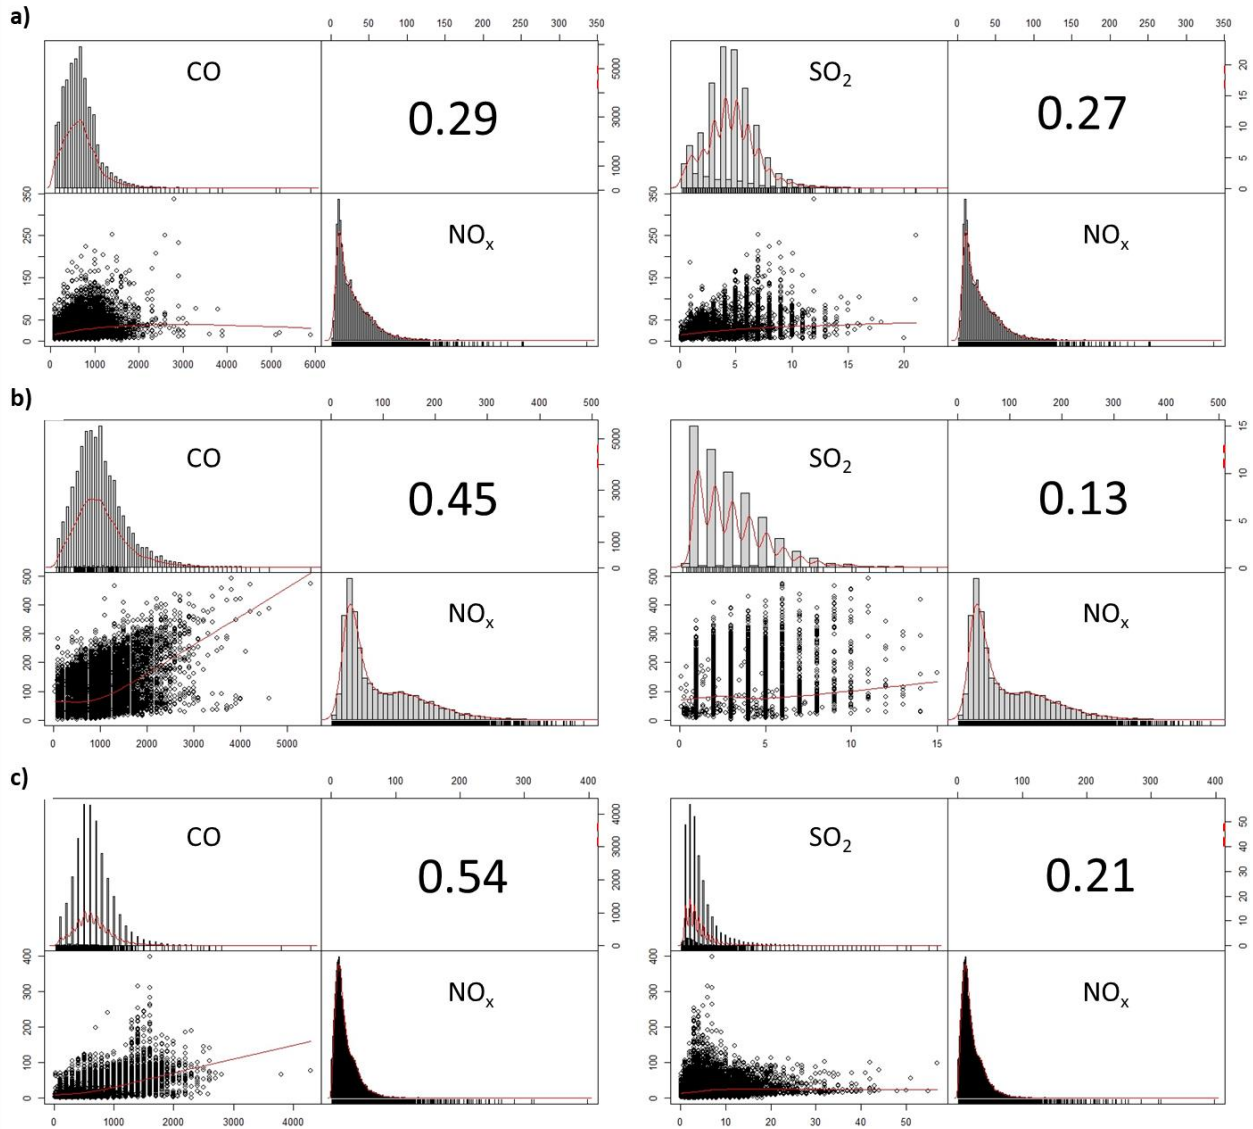

**Fig. V:** Correlation plots and correlation ( $r$ ) between CO/NO<sub>x</sub> and SO<sub>2</sub>/NO<sub>x</sub> and concentration distribution of species at a) BKK sites b) roadside sites and c) BKK suburb sites.

## AQI O<sub>3</sub> Calculation

To calculate AQI for O<sub>3</sub>, a midpoint of 8-hour average of O<sub>3</sub> concentration is needed. The midpoint of a specific hour is calculated from the average of hourly O<sub>3</sub> concentration of the previous four hours, at the given hour and the following three hours (Fig. VI a). To get a valid calculation, at least 6 of 8 records (75%), are needed. Calculated AQI values are compared with the AQI table (Fig. VI b) (US.EPA, 2017a, 2017b)

| Hours                               | 1 | 2                    | 3 | 4 | 5 | 6   | 7                     | 8 | 9 |
|-------------------------------------|---|----------------------|---|---|---|-----|-----------------------|---|---|
| [O <sub>3</sub> ] <sub>hourly</sub> |   |                      |   |   |   | *   |                       |   |   |
|                                     |   | The previous 4 hours |   |   |   | AQI | The following 3 hours |   |   |

**Fig VI a:** The calculation of a midpoint of AQI for O<sub>3</sub> (modified from US.EPA, 2017a)

| Air Quality Index (0-500)                | Who Needs to be Concerned?                                                                                                                  | What Should I Do?                                                                                                                                                                                                                                                                                                                                                                                                          |
|------------------------------------------|---------------------------------------------------------------------------------------------------------------------------------------------|----------------------------------------------------------------------------------------------------------------------------------------------------------------------------------------------------------------------------------------------------------------------------------------------------------------------------------------------------------------------------------------------------------------------------|
| Good (0-50)                              | It's a great day to be active outside.                                                                                                      |                                                                                                                                                                                                                                                                                                                                                                                                                            |
| Moderate (51-100)                        | Some people who may be unusually sensitive to ozone.                                                                                        | <b>Unusually sensitive people:</b> Consider reducing prolonged or heavy outdoor exertion. Watch for symptoms such as coughing or shortness of breath. These are signs to take it a little easier.<br><b>Everyone else:</b> It's a good day to be active outside.                                                                                                                                                           |
| Unhealthy for Sensitive Groups (101-150) | Sensitive groups include people with lung disease such as asthma, older adults, children and teenagers, and people who are active outdoors. | <b>Sensitive groups:</b> Reduce prolonged or heavy outdoor exertion. Take more breaks, do less intense activities. Watch for symptoms such as coughing or shortness of breath. Schedule outdoor activities in the morning when ozone is lower.<br><b>People with asthma</b> should follow their asthma action plans and keep quick relief medicine handy.                                                                  |
| Unhealthy (151 to 200)                   | <b>Everyone</b>                                                                                                                             | <b>Sensitive groups:</b> Avoid prolonged or heavy outdoor exertion. Schedule outdoor activities in the morning when ozone is lower. Consider moving activities indoors.<br><b>People with asthma,</b> keep quick-relief medicine handy.<br><b>Everyone else:</b> Reduce prolonged or heavy outdoor exertion. Take more breaks, do less intense activities. Schedule outdoor activities in the morning when ozone is lower. |
| Very Unhealthy (201-300)                 | <b>Everyone</b>                                                                                                                             | <b>Sensitive groups:</b> Avoid all physical activity outdoors. Move activities indoors or reschedule to a time when air quality is better.<br><b>People with asthma,</b> keep quick-relief medicine handy.<br><b>Everyone else:</b> Avoid prolonged or heavy outdoor exertion. Schedule outdoor activities in the morning when ozone is lower. Consider moving activities indoors.                                         |
| Hazardous (301-500)                      | <b>Everyone</b>                                                                                                                             | <b>Everyone:</b> Avoid all physical activity outdoors.                                                                                                                                                                                                                                                                                                                                                                     |

**Fig. VI b:** The AQI (US.EPA, 2017b)
